# Supplementary material
Source: PubMed Central journal article supplement (PMC2631292)
Supplement: JCI0935620sd.pdf [file JCI0935620sd.pdf]

### Supplementary Figure 1

Fetal gene upregulation by 1-wk TAC is significantly increased in mice lacking RGS2. *ANP(Nppa)* / *BNP(Nppb)* – A-type and B-type natriuretic peptide;  $\beta$ -MHC (*Myh7*) – beta myosin heavy chain. Reduced expression of *SERCA2a (Atp2a2a)* was similar in both groups. \*  $p < 0.001$  versus Sham; †  $p < 0.001$  versus TAC-1wk RGS2<sup>+/+</sup> and Sham; ‡  $p < 0.01$  versus corresponding (within genotype) Sham (n=3-8 for each group).

### Supplementary Figure 2A

Invasive hemodynamic data in mice after 48-hrs of TAC. The increase in afterload reflected by peak LV pressure, Ea, and systemic vascular resistance (SVR) was similar in both genotype groups (n=3-7 for each group). Cardiac output and stroke volume change was also similar in both groups. (deleted) None of these parameters yielded a significant interaction term by 2 way ANOVA (TAC×genotype).

### Supplementary Figure 2B

Summary echocardiographic data in RGS2<sup>+/+</sup> mice, and RGS2<sup>-/-</sup> mice subjected to 48-hr TAC. The latter group was further co-treated with the PLC $\beta$  inhibitor U73122, or its inactive analog U73433 as a control. Inhibition of PLC $\beta$  prevented early chamber dilation (LV-diastolic diameter: LV-Dd), wall thickening, and reduced fractional shortening (FS) in the RGS2<sup>-/-</sup> hearts (n=4-9 in each group). \*  $p < 0.01$  versus Sham for each corresponding genotype.

**Supplementary Figure 3**

Expression of calcineurin (Cn), phosphorylated CaMKII and ERK1/2 in mice subjected to 6-wk swimming exercise in RGS2<sup>+/+</sup> and RGS2<sup>-/-</sup> groups. Unlike with TAC, none of these signaling cascades were stimulated by swimming in either of the genotype groups (n=3-6 in each group).

**Supplementary Figure 4A**

Example of normal PKG1- $\alpha$  distribution in myocyte from RGS2<sup>-/-</sup> heart showing diffuse localization as observed in control (RGS2<sup>+/+</sup>) cells under rest conditions.

**Supplementary Figure 4B.**

Ponceau stains of membranes confirming equal protein loading for particulate and soluble fractions for the analysis displayed in Figure 7D.

# Supplementary Figure 1

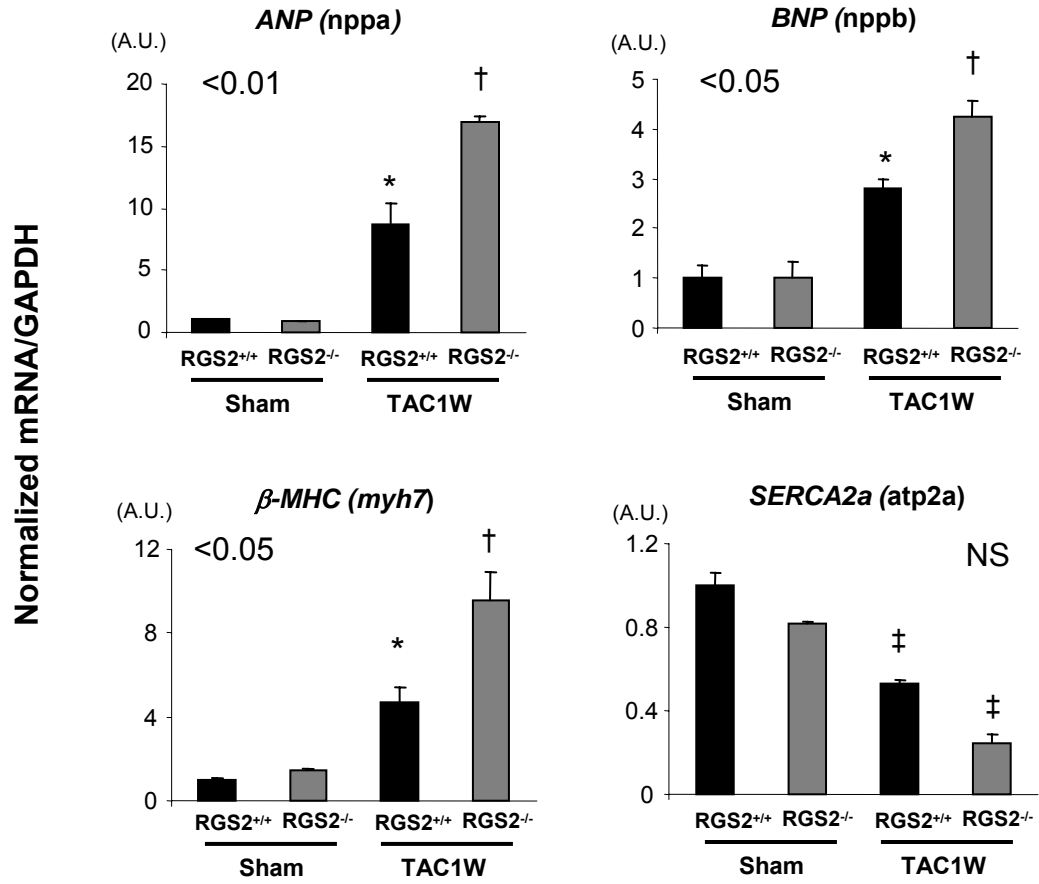

## Supplementary Figure 2A

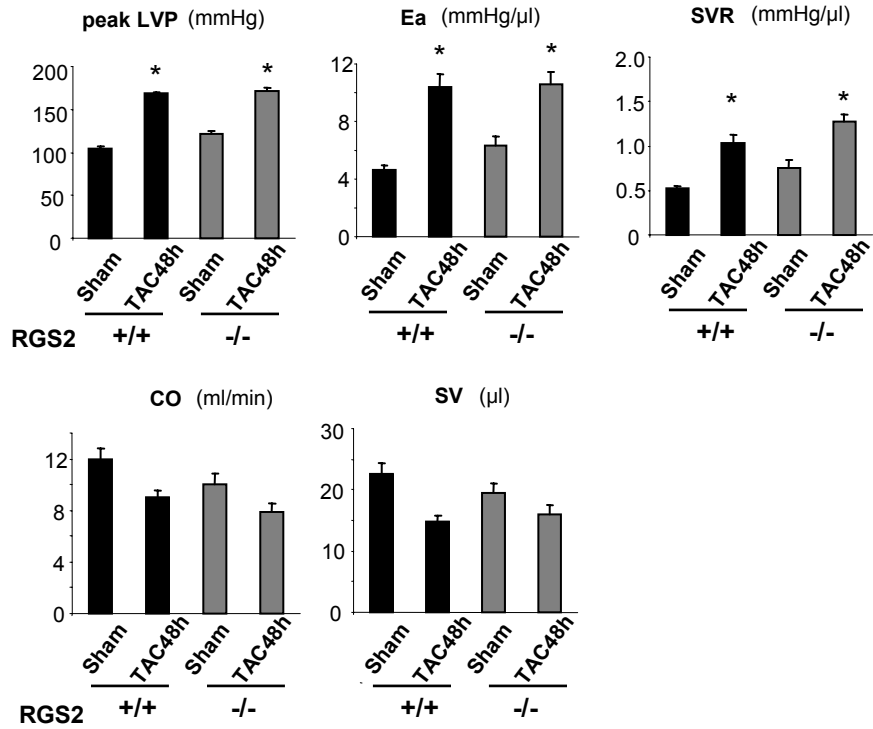

## Supplementary Figure 2B

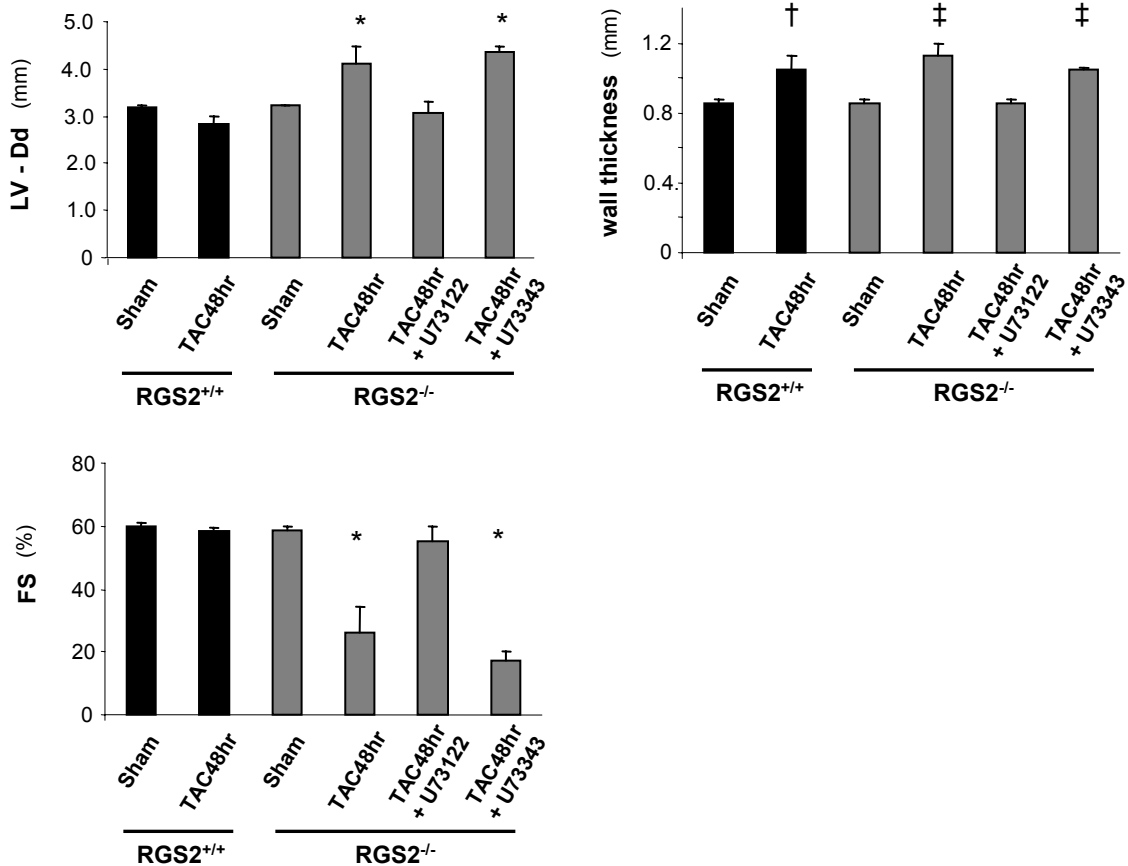

### Supplemental Figure 3

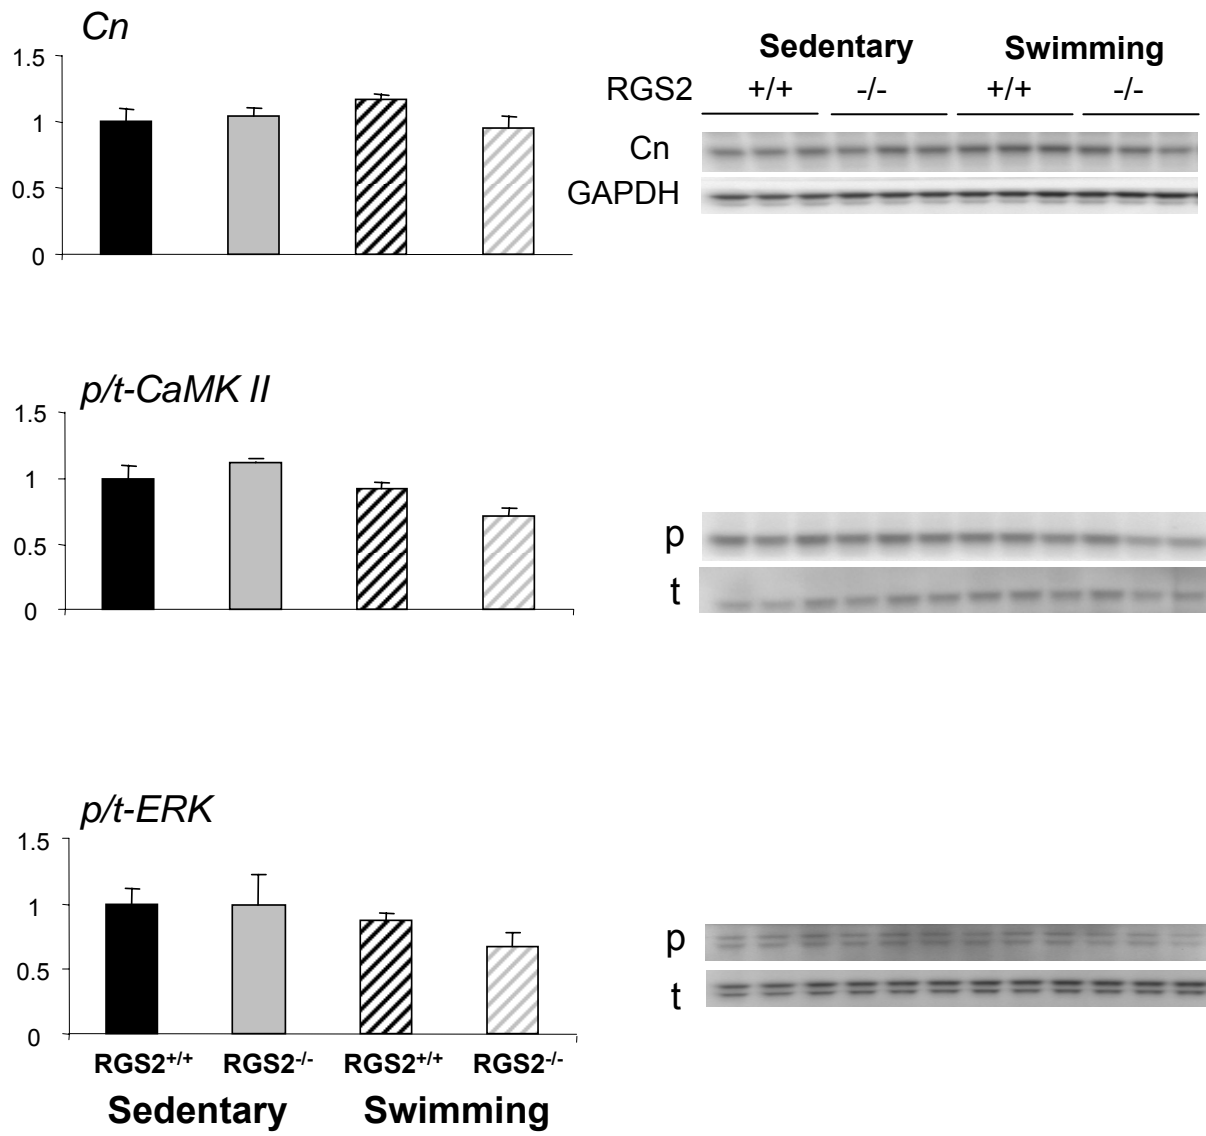

### Supplementary Figure 4A

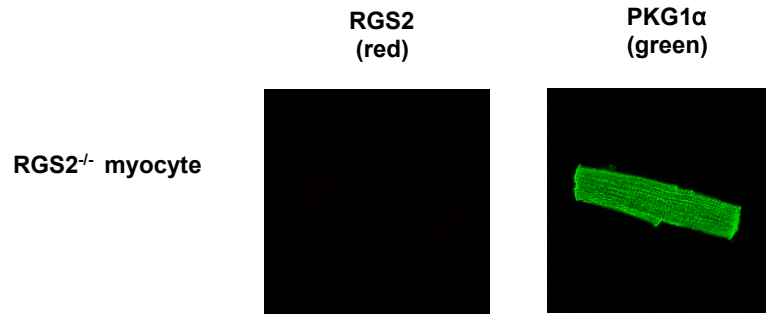

### Supplementary Figure 4B

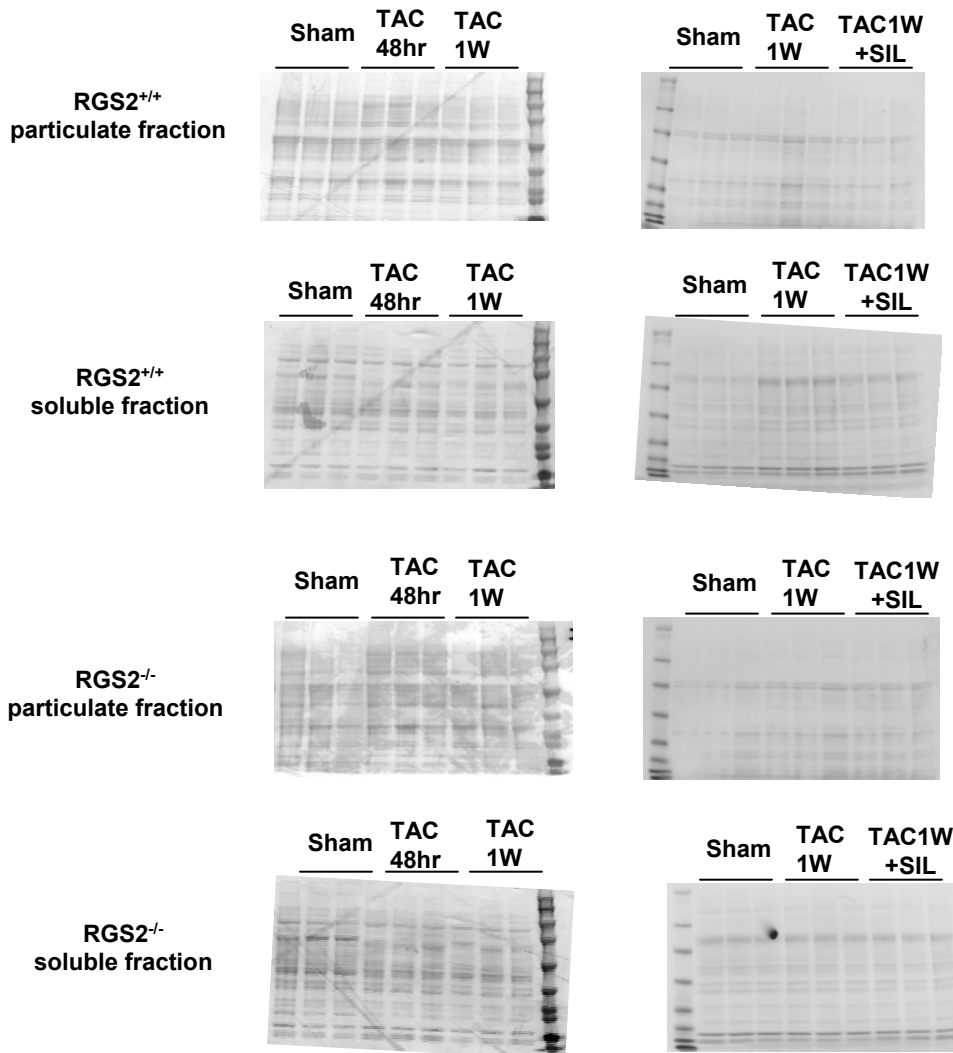

**Supplementary Table 1 Baseline Characteristics (Body Weight, Heart Weight and Echocardiographic Parameters) in 4-5 month old mice.**

| Age          | 4-5 month                       |                                 |
|--------------|---------------------------------|---------------------------------|
| Genotype     | RGS2 <sup>+/+</sup><br>(n = 10) | RGS2 <sup>-/-</sup><br>(n = 12) |
| BW (g)       | 26.2 ± 0.5                      | 25.2 ± 0.5                      |
| HW/TL (g/cm) | 63.5 ± 1.7                      | 63.5 ± 1.7                      |
| LV-Dd (mm)   | 3.26 ± 0.04                     | 3.22 ± 0.05                     |
| LV-Ds (mm)   | 1.32 ± 0.03                     | 1.30 ± 0.03                     |
| WT (mm)      | 0.84 ± 0.01                     | 0.84 ± 0.01                     |
| %FS          | 59.0 ± 0.6                      | 59.9 ± 0.7                      |
| HR (bpm)     | 672 ± 10                        | 672 ± 10                        |

Data are mean ± SE. p=NS for all between group comparisons (RGS2<sup>+/+</sup> vs RGS2<sup>-/-</sup>).

BW – body weight; HW/TL – heart weight normalized to tibia length; LV-Dd - end-diastolic dimension of left ventricle; LV-Ds - end-systolic dimension of left ventricle; WT - averaged wall thickness of lateral wall and intraventricular septum; %FS - percent fractional shortening calculated as follows: %FS = (LV-Dd – LV-Ds)/ LV-Dd x 100; HR - heart rate.

**Supplementary Table 2 Baseline Hemodynamics (age: 4 - 5 month old)**

| Genotype                           | RGS2 <sup>+/+</sup> (n = 7) | RGS2 <sup>-/-</sup> (n = 7) |
|------------------------------------|-----------------------------|-----------------------------|
| LVP sys (mmHg)                     | 104.7 ± 1.7                 | 120.9 ± 11.1 *              |
| LVP dia (mmHg)                     | 5.4 ± 0.8                   | 5.7 ± 0.7                   |
| Ea (mmHg. $\mu\text{l}^{-1}$ )     | 4.6 ± 0.3                   | 6.3 ± 0.7 *                 |
| SVR (mmHg. $\mu\text{l}^{-1}$ )    | 0.52 ± 0.04                 | 0.75 ± 0.09 *               |
| SV ( $\mu\text{l}$ )               | 22.5 ± 1.8                  | 19.5 ± 1.6                  |
| CO (ml/min)                        | 11.9 ± 0.9                  | 10.0 ± 0.9                  |
| EF                                 | 0.65 ± 0.04                 | 0.64 ± 0.02                 |
| dPdtmx (mmHg.s <sup>-1</sup> )     | 11732 ± 769                 | 12187 ± 469                 |
| dPdt /IP (s <sup>-1</sup> )        | 187.4 ± 14.7                | 172.2 ± 6.2                 |
| PMXI (mmHg.s <sup>-1</sup> )       | 30.6 ± 2.2                  | 29.1 ± 1.6                  |
| PRSW (mmHg)                        | 80.6 ± 5.6                  | 89.2 ± 5.8                  |
| Ees (mmHg. $\mu\text{l}^{-1}$ )    | 5.71 ± 0.96                 | 5.85 ± 0.82                 |
| V <sub>100</sub> ( $\mu\text{l}$ ) | 11.5 ± 1.9                  | 7.9 ± 1.3                   |
| dPdtmn (mmHg.s <sup>-1</sup> )     | -10422 ± 441                | -11226 ± 566                |
| Tau (ms)                           | 7.7 ± 0.5                   | 8.3 ± 0.4                   |
| PFR /EDV (s <sup>-1</sup> )        | 35.7 ± 2.4                  | 32.9 ± 3.5                  |
| HR (bpm)                           | 532.3 ± 7.8                 | 513.3 ± 11.1                |

Data are mean ± SE.



LVP sys - LV end-systolic pressure; LVP dia - LV end-diastolic pressure; Ea - effective arterial elastance - an index of total ventricular afterload; SVR - systemic vascular resistance; SV - LV stroke volume; CO - cardiac output; EF - ejection fraction. Contractile systolic indexes are:  $dP/dt_{max}$  - maximal rate of pressure rise;  $dP/dt_{mx}/IP$  -  $dP/dt_{max}$  normalized to instantaneous developed pressure; PMXI - power index: maximal ventricular power divided by end-diastolic volume; PRSW - preload recruitable stroke work; Ees - end-systolic elastance;  $V_{100}$  - end-systolic volume at common end-systolic pressure (= 100mmHg) derived from ESPVR. Diastolic indexes are: Tau - time constant of pressure relaxation;  $dP/dt_{min}$  - peak rate of LV pressure decline; PFR/EDV - peak ventricular filling rate normalized to end-diastolic volume. The latter reflects early diastolic properties, i.e. relaxation and passive stiffness during early filling. A higher value reflects improved diastolic function. \* $p < 0.05$  vs RGS2<sup>+/+</sup>.

**Supplementary Table 3 Baseline Characteristics (Body Weight, Heart Weight and Echocardiographic Parameters) in 10 month old mice.**

| Age          | 10 month                        |                                 |
|--------------|---------------------------------|---------------------------------|
| Genotype     | RGS2 <sup>+/+</sup><br>(n = 14) | RGS2 <sup>-/-</sup><br>(n = 15) |
| BW (g)       | 33.3 ± 0.7                      | 31.5 ± 0.5                      |
| HW/TL (g/cm) | 83.3 ± 3.2                      | 85.4 ± 4.3                      |
| LV-Dd (mm)   | 3.45 ± 0.07                     | 3.51 ± 0.06                     |
| LV-Ds (mm)   | 1.43 ± 0.08                     | 1.35 ± 0.04                     |
| WT (mm)      | 0.94 ± 0.01                     | 0.94 ± 0.02                     |
| %FS          | 58.5 ± 1.6                      | 61.5 ± 0.7                      |
| HR (bpm)     | 643 ± 9                         | 639 ± 10                        |

Data are mean ± SE. p=NS for all between group comparisons (RGS2<sup>+/+</sup> vs RGS2<sup>-/-</sup>).

BW – body weight; HW/TL – heart weight normalized to tibia length; LV-Dd - end-diastolic dimension of left ventricle; LV-Ds - end-systolic dimension of left ventricle; WT - averaged wall thickness of lateral wall and intraventricular septum; %FS - percent fractional shortening calculated as follows: %FS = (LV-Dd – LV-Ds)/ LV-Dd x 100; HR - heart rate.
